# Supplementary material
Source: MDPI journal article supplement (https://www.mdpi.com/search?q=ijms-22-01735)
Supplement: s001 [file ijms-22-01735-s001.pdf]

Table S1. List of primer sequences.

|                | Gene          | Sequences of forward (1st line) and reverse (2nd line) primers                                                |
|----------------|---------------|---------------------------------------------------------------------------------------------------------------|
| Real-time PCR  | <i>SIFKF1</i> | 5'-ATAGCACATGCGTGGTGGGAG-3'<br>5'-TTGCTCGCTAAGCACAATTCATAC-3'                                                 |
|                | <i>SIACT</i>  | 5'-CACTGTATGCCAGTGGTCGT-3'<br>5'-ACGTCCCTGACAATTTCTCG-3                                                       |
|                | <i>SIUBI3</i> | 5'-CACCAAGCCAAAGAAGATCA-3'<br>5'-TCAGCATTAGGGCACTCCT-3'                                                       |
| Transformation | <i>SIFKF1</i> | 5'-GGGGACAAGTTTGTACAAAAAAGCAGGCTCTTGCCAACAGCGCTAAC-3'<br>5'-GGGGACCACTTTGTACAAGAAAGCTGGGTCTTGTCCTCCAACCACG-3' |

Table S2. Accession numbers of proteins used for the phylogenetic tree analysis.

| Name   | Accession number |
|--------|------------------|
| AtZTL  | AT5G57360        |
| GmZTL1 | NM_001248927     |
| SlZTL  | XM_004242857     |
| InZTL  | AB265784         |
| McZTL  | AY371290         |
| OsZTL  | XM_015787692     |
| SIFKF1 | XM_004228691     |
| InFKF1 | KJ605442         |
| GmFKF2 | XM_003530876     |
| GmFKF1 | NM_001248957     |
| AtFKF1 | AT1G68050        |
| McFKF1 | AAQ73528         |
| OsFKF1 | XM_015761570     |

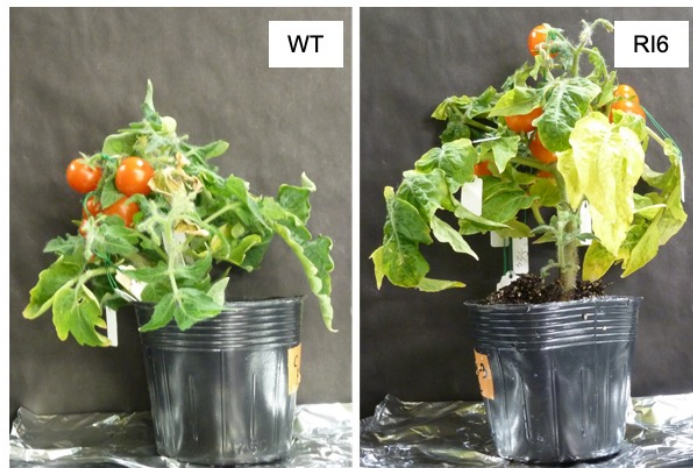

Figure S1. Wild-type (WT) and SIFKF1 RNAi line (RI6) plants with ripe fruit.
